# Supplementary material for: Heat stress-induced response of the proteomes of leaves from Salvia splendens Vista and King
Source: PubMed Central journal article supplement (PMC3720558; doi:10.1186/1477-5956-11-25), 2013-06-18
Supplement: 1477-5956-11-25-S2.pdf [file 1477-5956-11-25-S2.pdf]

## Supplemental Data 2. Primers used for real-time PCR

| Gene                                          | Spot no. | Gene symbol  | Forward primer       | Reverse primer        |
|-----------------------------------------------|----------|--------------|----------------------|-----------------------|
| <b>Vista variety</b>                          |          |              |                      |                       |
| Chlorophyll a/b binding protein               | D09      | X74732       | TGGGTTTGATTGAGGGCTAC | GGTGATCGGAAAGGTTCTCA  |
| Class-1 LMW heat shock protein                | D12      | AY098528     | CCGCATAGATTGGAAGGAGA | GAACCTGCGTAGGAACTTGC  |
| Ribulose-1,5-bisphosphate carboxylase subunit | C03      | AY570407     | CACAGGCTGAAACAGGTGAA | CGGCAATAATGAGCCAAACT  |
| NAD dependent dehydratase                     | C17      | XM_002512495 | GCAGGCAAAAGGAGCACTAC | GGTCTGATTCACCTGGCAAT  |
| Degp1                                         | C18      | AB642507     | GAGGTACCACAAGGCTCTGG | AAGATCCGCAGAGACTCCAA  |
| <b>King variety</b>                           |          |              |                      |                       |
| ER-binding protein                            | B05      | AY729667     | AGCGACAGATCGACGAGATT | GAGCGACATCAAGGAGAAGG  |
| Transketolase                                 | B08      | XM_002511644 | CCTTTCCATGTTCCAGAGGA | GTAGCATCTGCTGGGCTTTC  |
| Ribulose bisphosphate carboxylase activase    | B15      | FJ787730     | CAACAACCAGATGGTCAACG | TACCCTTGCACACACCGATA  |
| ATP synthase beta subunit                     | A02      | EF118880     | TATCCGTATTTGGCGGAGTC | CCATAGTTAGGGCCGTCAAA  |
| pyridoxal biosynthesis protein PDX1           | A06      | XM_002278355 | TGATGATGCAGTTGGGTTGT | CTGACCGATTTCGCATACCTT |
| <b>Reference gene</b>                         |          |              |                      |                       |
| 5.8S ribosomal RNA                            |          | AF477788     | CAACGGATATCTCGGCTCTC | TTGCGTTCAAAGACTCGATG  |
